# Supplementary material for: Performance of Antigen Detection Tests for SARS-CoV-2: A Systematic Review and Meta-Analysis
Source: MDPI journal article supplement (doi:10.3390/diagnostics12061388), 2022-06-04
Supplement: s1 [file s1]

**Supplementary Table S1. The QUADAS tool Item**

|                                                                                                                                                                           | <b>Yes</b>   | <b>No</b>    | <b>Unclear</b> |
|---------------------------------------------------------------------------------------------------------------------------------------------------------------------------|--------------|--------------|----------------|
| <b>1. Was the spectrum of patients representative of the patients who will receive the test in practice?</b>                                                              | <b>(235)</b> | <b>(-)</b>   | <b>(-)</b>     |
| <b>2. Were selection criteria clearly described?</b>                                                                                                                      | <b>(235)</b> | <b>(-)</b>   | <b>(-)</b>     |
| <b>3. Is the reference standard likely to correctly classify the target condition?</b>                                                                                    | <b>(235)</b> | <b>(-)</b>   | <b>(-)</b>     |
| <b>4. Is the time period between reference standard and index test short enough to be reasonably sure that the target condition did not change between the two tests?</b> | <b>(198)</b> | <b>(-)</b>   | <b>(37)</b>    |
| <b>5. Did the whole sample or a random selection of the sample, receive verification using a reference standard of diagnosis?</b>                                         | <b>(234)</b> | <b>(1)</b>   | <b>(-)</b>     |
| <b>6. Did patients receive the same reference standard regardless of the index test result?</b>                                                                           | <b>(125)</b> | <b>(49)</b>  | <b>(61)</b>    |
| <b>7. Was the reference standard independent of the index test (i.e., the index test did not form part of the reference standard)?</b>                                    | <b>(235)</b> | <b>(-)</b>   | <b>(-)</b>     |
| <b>8. Was the execution of the index test described in sufficient detail to permit replication of the test?</b>                                                           | <b>(189)</b> | <b>(7)</b>   | <b>(39)</b>    |
| <b>9. Was the execution of the reference standard described in sufficient detail to permit its replication?</b>                                                           | <b>(158)</b> | <b>(17)</b>  | <b>(60)</b>    |
| <b>10. Were the index test results interpreted without knowledge of the results of the reference standard?</b>                                                            | <b>(112)</b> | <b>(11)</b>  | <b>(112)</b>   |
| <b>11. Were the reference standard results interpreted without knowledge of the results of the index test?</b>                                                            | <b>(97)</b>  | <b>(5)</b>   | <b>(133)</b>   |
| <b>12. Were the same clinical data available when test results were interpreted as would be available when the test is used in practice?</b>                              | <b>(79)</b>  | <b>(2)</b>   | <b>(154)</b>   |
| <b>13. Were uninterpretable/ intermediate test results reported?</b>                                                                                                      | <b>(50)</b>  | <b>(175)</b> | <b>(10)</b>    |
| <b>14. Were withdrawals from the study explained?</b>                                                                                                                     | <b>(229)</b> | <b>(4)</b>   | <b>(2)</b>     |
