# Supplementary material for: Performance of Antigen Detection Tests for SARS-CoV-2: A Systematic Review and Meta-Analysis
Source: Diagnostics (Basel). 2022 Jun 4;12(6):1388. doi: 10.3390/diagnostics12061388 (PMC9221910; doi:10.3390/diagnostics12061388)
Supplement: Supplementary file 1 [file diagnostics-12-01388-s001.zip › Supplemntary_File_S1 (1).xlsx]

## Sheet: bias
STUDY	PATIENT SELECTION	INDEX TEST	REFERENCE STANDARD	FLOW AND TIMING
Study 2	Low	Low	Low	Low
Study 3	Low	Unclear	Unclear	Low
Study 4	Low	Unclear	Unclear	Low
Study 5	Low	Low	Low	Low
Study 6	Low	Unclear	Unclear	Low
Study 7	Low	Low	Unclear	Low
Study 8	Low	Unclear	Unclear	Low
Study 9	Low	Unclear	Unclear	Low
Study 10	Low	Unclear	Unclear	Low
Study 11	Low	Low	Low	Low
Study 12	Low	Low	Low	Low
Study 13	Low	Unclear	Unclear	High
Study 14	Low	Unclear	Unclear	Unclear
Study 15	Low	Unclear	Unclear	Low
Study 16	Low	Unclear	Unclear	High
Study 17	Low	Unclear	Low	Low
Study 18	Low	Unclear	Unclear	Low
Study 19	Low	Unclear	Unclear	Unclear
Study 20	Low	Low	Low	Unclear		Low	235	158	124	177
Study 21	Low	Unclear	Unclear	Low		High	0	10	2	28
Study 22	Low	Unclear	Unclear	High		Unclear	0	67	109	30
Study 23	Low	Low	Low	Low			235	235	235	235
Study 25	Low	Unclear	Unclear	Low
Study 26	Low	Unclear	Low	Low
Study 27	Low	Low	Unclear	Low
Study 28	Low	Unclear	Unclear	Low
Study 29	Low	Low	Unclear	Low
Study 31	Low	Unclear	Unclear	Low
Study 35	Low	Low	Unclear	Low
Study 36	Low	Low	Unclear	Low
Study 40	Low	Unclear	Unclear	Unclear
Study 43	Low	Unclear	Unclear	Low
Study 44	Low	Low	Unclear	Low
Study 45	Low	Unclear	Unclear	Unclear
Study 49	Low	Unclear	Unclear	Unclear
Study 51	Low	Low	Low	Low
Study 53	Low	Unclear	Unclear	Unclear
Study 54	Low	Low	Low	High
Study 56	Low	Unclear	Low	Unclear
Study 58	Low	Unclear	Low	Unclear
Study 59	Low	Unclear	Low	Low
Study 60	Low	Low	Low	Low
Study 62	Low	Low	Low	Low
Study 63	Low	Low	Low	Low
Study 64	Low	High	Unclear	Unclear
Study 65	Low	Unclear	Low	Low
Study 66	Low	Unclear	Low	High
Study 67	Low	Unclear	Unclear	Unclear
Study 68	Low	High	Low	Unclear
Study 69	Low	Low	Low	High
Study 70	Low	High	Low	High
Study 71	Low	High	Low	High
Study 72	Low	Low	Unclear	Unclear
Study 73	Low	Low	Low	Low
Study 74	Low	Low	Low	Low
Study 75	Low	Low	Low	Low
Study 76	Low	Low	Low	Low
Study 77	Low	Low	Low	Low
Study 78	Low	Low	Unclear	Low
Study 79	Low	Low	Unclear	Low
Study 80	Low	Low	Unclear	Low
Study 81	Low	High	Unclear	Low
Study 82	Low	Low	Low	Unclear
Study 83	Low	Low	Unclear	Low
Study 84	Low	Low	Low	Low
Study 85	Low	Unclear	High	High
Study 86	Low	Low	Low	Low
Study 87	Low	Low	Low	Low
Study 88	Low	Low	Unclear	High
Study 89	Low	Low	Unclear	Low
Study 90	Low	Low	Unclear	Low
Study 91	Low	Unclear	Unclear	Low
Study 92	Low	Low	Unclear	High
Study 93	Low	Low	Unclear	Low
Study 94	Low	Low	Low	Low
Study 95	Low	Low	Unclear	Unclear
Study 96	Low	Low	Unclear	Low
Study 97	Low	Low	Unclear	Low
Study 98	Low	Low	Low	High
Study 99	Low	Low	Unclear	High
Study 100	Low	Low	Low	High
Study 101	Low	Low	Low	High
Study 102	Low	Low	Unclear	Unclear
Study 103	Low	Low	Unclear	Unclear
Study 104	Low	Low	Low	Unclear
Study 105	Low	Low	Low	Low
Study 106	Low	Low	Low	Low
Study 107	Low	Low	Low	Low
Study 108	Low	Low	Low	Low
Study 109	Low	Low	Low	High
Study 110	Low	Low	Low	High
Study 111	Low	Low	Low	Low
Study 112	Low	Low	Low	Low
Study 113	Low	Low	Low	High
Study 114	Low	Low	Unclear	High
Study 115	Low	Low	Unclear	High
Study 116	Low	Low	Unclear	High
Study 117	Low	Low	Unclear	Unclear
Study 118	Low	Low	Unclear	Low
Study 119	Low	Low	Low	High
Study 120	Low	Low	Low	Low
Study 121	Low	Low	Low	Low
Study 122	Low	Low	Low	Low
Study 123	Low	Low	Low	Low
Study 124	Low	Low	Low	Low
Study 125	Low	Low	Unclear	Low
Study 126	Low	Low	Unclear	High
Study 127	Low	Low	Unclear	Low
Study 128	Low	Low	Low	Low
Study 129	Low	Low	Unclear	Low
Study 130	Low	Low	Low	Low
Study 131	Low	Unclear	Unclear	Low
Study 132	Low	Low	Unclear	Unclear
Study 133	Low	Low	Low	Low
Study 134	Low	Low	Unclear	Low
Study 135	Low	Low	Unclear	Unclear
Study 136	Low	Low	Unclear	Unclear
Study 137	Low	Low	Unclear	Low
Study 138	Low	Low	Low	Low
Study 139	Low	Low	Low	High
Study 140	Low	Low	Low	Low
Study 141	Low	Low	Low	Low
Study 142	Low	Unclear	Low	Unclear
Study 143	Low	Low	Low	High
Study 144	Low	Low	Low	Low
Study 145	Low	Low	Low	Low
Study 146	Low	Low	Low	Low
Study 147	Low	Low	Low	High
Study 148	Low	Low	Unclear	Unclear
Study 149	Low	Low	Low	High
Study 150	Low	Low	Low	Unclear
Study 151	Low	Low	Low	Low
Study 152	Low	Low	Low	Low
Study 153	Low	Low	Low	Unclear
Study 154	Low	Low	Low	Low
Study 155	Low	Unclear	Unclear	Unclear
Study 156	Low	Low	Low	Low
Study 157	Low	Low	Low	Low
Study 158	Low	Low	Low	Low
Study 159	Low	Low	Low	High
Study 160	Low	Low	Unclear	Low
Study 161	Low	Low	Low	Low
Study 162	Low	Low	Low	Low
Study 163	Low	Low	Low	Low
Study 164	Low	Low	Low	Low
Study 165	Low	High	Low	Low
Study 166	Low	Low	Low	Low
Study 167	Low	Low	Low	Low
Study 168	Low	High	Low	Unclear
Study 169	Low	Low	Low	Unclear
Study 170	Low	Unclear	Low	Low
Study 171	Low	Low	Low	Low
Study 172	Low	Low	Low	Low
Study 173	Low	Low	Low	Low
Study 174	Low	Unclear	Low	Low
Study 175	Low	Low	Low	Low
Study 176	Low	Low	Low	Low
Study 177	Low	Low	Low	Low
Study 178	Low	Unclear	Unclear	Low
Study 179	Low	Unclear	Low	Unclear
Study 180	Low	Low	Unclear	Low
Study 181	Low	Unclear	Low	Low
Study 182	Low	Unclear	Unclear	Low
Study 183	Low	Low	Low	Low
Study 184	Low	Unclear	Unclear	Low
Study 185	Low	Low	Low	Low
Study 186	Low	Low	Unclear	Low
Study 187	Low	Low	Unclear	Low
Study 188	Low	Low	Unclear	Low
Study 189	Low	Unclear	Unclear	Low
Study 190	Low	Low	Unclear	Low
Study 192	Low	Low	Low	Low
Study 193	Low	Unclear	Unclear	Low
Study 194	Low	Low	Unclear	Low
Study 195	Low	Unclear	Low	Low
Study 196	Low	Unclear	Low	Low
Study 197	Low	Unclear	Low	Low
Study 198	Low	Low	Unclear	Low
Study 199	Low	High	Low	Low
Study 200	Low	Unclear	Unclear	Low
Study 201	Low	Unclear	Low	Low
Study 202	Low	Unclear	Low	Low
Study 203	Low	Low	Low	Low
Study 204	Low	Unclear	Low	Low
Study 205	Low	Unclear	Low	Low
Study 206	Low	Unclear	Low	Low
Study 207	Low	Low	Low	Low
Study 208	Low	Unclear	Low	Low
Study 209	Low	Low	Unclear	Low
Study 210	Low	Unclear	Unclear	Low
Study 211	Low	Unclear	Unclear	Low
Study 212	Low	Low	Unclear	Low
Study 213	Low	Low	Low	Low
Study 214	Low	High	Low	Low
Study 215	Low	Low	Low	Low
Study 216	Low	Low	Low	Low
Study 218	Low	Low	High	Low
Study 219	Low	Unclear	Unclear	Low
Study 220	Low	Unclear	Low	Low
Study 223	Low	Low	Unclear	Low
Study 224	Low	Low	Unclear	Low
Study 225	Low	Low	Unclear	Low
Study 226	Low	Low	Unclear	Low
Study 227	Low	Low	Low	Low
Study 228	Low	Low	Unclear	Low
Study 229	Low	Unclear	Low	Low
Study 230	Low	Unclear	Low	Low
Study 231	Low	Low	Unclear	Low
Study 232	Low	Low	Low	Low
Study 233	Low	Low	Unclear	Low
Study 234	Low	Low	Unclear	Low
Study 235	Low	Low	Unclear	Low
Study 236	Low	Low	Unclear	Low
Study 237	Low	Low	Low	Low
Study 238	Low	Unclear	Low	Low
Study 239	Low	Low	Unclear	Low
Study 240	Low	Unclear	Unclear	Low
Study 242	Low	Unclear	Unclear	Low
Study 245	Low	Low	Unclear	Low
Study 246	Low	Unclear	Unclear	Low
Study 247	Low	Low	Unclear	Low
Study 248	Low	Unclear	Unclear	Low
Study 249	Low	Low	Low	Low
Study 250	Low	Low	Unclear	Low
Study 251	Low	Unclear	Unclear	Low
Study 252	Low	Low	Unclear	Low
Study 253	Low	Low	Low	Low
Study 254	Low	High	Low	Low
Study 255	Low	Unclear	Unclear	Low
Study 256	Low	Low	Low	Low
Study 257	Low	Low	Unclear	Low
Study 258	Low	Low	Unclear	Low
Study 259	Low	Low	Low	Low
Study 260	Low	Low	Unclear	Low
Study 261	Low	Low	Unclear	Low

## Sheet: applicability
STUDY	PATIENT SELECTION	INDEX TEST	REFERENCE STANDARD
Study 2	Low	Low	Low
Study 3	Low	Low	Low
Study 4	Low	Low	Low
Study 5	Low	Low	Low
Study 6	Low	Low	Low			Low	235	200	207
Study 7	Low	Low	Low			High	0	4	1
Study 8	Low	Low	Low			Unclear	0	31	27
Study 9	Low	Low	Low				235	235	235
Study 10	Low	Low	Low
Study 11	Low	Low	Low
Study 12	Low	Low	Low
Study 13	Low	Low	Low
Study 14	Low	Low	Low
Study 15	Low	Low	Low
Study 16	Low	Low	Low
Study 17	Low	Low	Low
Study 18	Low	Low	Low
Study 19	Low	Low	Low
Study 20	Low	Low	Low
Study 21	Low	Low	Low
Study 22	Low	Low	Low
Study 23	Low	Low	Low
Study 25	Low	Low	Low
Study 26	Low	Low	Low
Study 27	Low	Low	Low
Study 28	Low	Low	Low
Study 29	Low	Low	Low
Study 31	Low	Low	Low
Study 35	Low	Low	Low
Study 36	Low	Low	Low
Study 40	Low	Low	High
Study 43	Low	Low	Low
Study 44	Low	Low	Low
Study 45	Low	Low	Unclear
Study 49	Low	Low	Low
Study 51	Low	Low	Low
Study 53	Low	Low	Low
Study 54	Low	Low	Low
Study 56	Low	High	Low
Study 58	Low	Low	Low
Study 59	Low	Low	Low
Study 60	Low	Low	Low
Study 62	Low	Low	Low
Study 63	Low	Low	Low
Study 64	Low	Low	Low
Study 65	Low	Low	Low
Study 66	Low	Low	Low
Study 67	Low	Low	Low
Study 68	Low	Unclear	Low
Study 69	Low	Low	Low
Study 70	Low	Low	Low
Study 71	Low	Low	Low
Study 72	Low	Low	Low
Study 73	Low	Low	Low
Study 74	Low	Low	Low
Study 75	Low	Low	Low
Study 76	Low	Unclear	Low
Study 77	Low	Low	Low
Study 78	Low	Low	Low
Study 79	Low	Low	Low
Study 80	Low	Low	Low
Study 81	Low	Low	Low
Study 82	Low	Low	Low
Study 83	Low	Low	Low
Study 84	Low	Low	Low
Study 85	Low	Low	Low
Study 86	Low	Low	Low
Study 87	Low	Low	Low
Study 88	Low	Low	Low
Study 89	Low	Low	Low
Study 90	Low	Low	Low
Study 91	Low	Low	Low
Study 92	Low	Low	Low
Study 93	Low	Unclear	Low
Study 94	Low	Low	Low
Study 95	Low	Low	Low
Study 96	Low	Low	Low
Study 97	Low	Low	Low
Study 98	Low	Low	Low
Study 99	Low	Low	Low
Study 100	Low	Low	Low
Study 101	Low	Low	Low
Study 102	Low	Low	Low
Study 103	Low	Low	Low
Study 104	Low	Low	Low
Study 105	Low	Low	Low
Study 106	Low	Low	Low
Study 107	Low	Low	Low
Study 108	Low	Low	Low
Study 109	Low	Low	Low
Study 110	Low	Low	Low
Study 111	Low	Low	Low
Study 112	Low	Low	Low
Study 113	Low	Low	Low
Study 114	Low	Low	Low
Study 115	Low	Low	Low
Study 116	Low	Low	Low
Study 117	Low	Low	Low
Study 118	Low	Low	Low
Study 119	Low	Low	Low
Study 120	Low	Low	Low
Study 121	Low	Low	Low
Study 122	Low	Low	Low
Study 123	Low	Low	Low
Study 124	Low	Low	Low
Study 125	Low	Low	Low
Study 126	Low	Low	Low
Study 127	Low	Low	Low
Study 128	Low	Low	Low
Study 129	Low	Low	Low
Study 130	Low	Low	Low
Study 131	Low	Low	Low
Study 132	Low	Low	Low
Study 133	Low	Low	Low
Study 134	Low	Low	Low
Study 135	Low	Unclear	Low
Study 136	Low	Unclear	Low
Study 137	Low	Low	Low
Study 138	Low	Low	Low
Study 139	Low	Low	Low
Study 140	Low	Low	Low
Study 141	Low	Low	Low
Study 142	Low	Unclear	Low
Study 143	Low	Low	Low
Study 144	Low	Low	Low
Study 145	Low	Low	Low
Study 146	Low	Low	Low
Study 147	Low	Low	Low
Study 148	Low	Unclear	Low
Study 149	Low	Low	Low
Study 150	Low	Low	Low
Study 151	Low	Low	Low
Study 152	Low	Low	Low
Study 153	Low	Low	Low
Study 154	Low	Low	Low
Study 155	Low	Low	Low
Study 156	Low	Unclear	Low
Study 157	Low	Unclear	Low
Study 158	Low	Low	Low
Study 159	Low	Low	Low
Study 160	Low	Low	Low
Study 161	Low	Low	Low
Study 162	Low	Low	Low
Study 163	Low	Low	Low
Study 164	Low	Low	Low
Study 165	Low	Low	Low
Study 166	Low	Low	Low
Study 167	Low	Low	Low
Study 168	Low	Low	Low
Study 169	Low	Low	Low
Study 170	Low	Low	Low
Study 171	Low	Low	Low
Study 172	Low	Low	Low
Study 173	Low	Low	Low
Study 174	Low	Low	Low
Study 175	Low	Low	Low
Study 176	Low	Low	Low
Study 177	Low	Low	Low
Study 178	Low	Unclear	Low
Study 179	Low	Low	Low
Study 180	Low	Low	Low
Study 181	Low	Low	Low
Study 182	Low	Low	Low
Study 183	Low	Low	Low
Study 184	Low	Low	Low
Study 185	Low	Low	Low
Study 186	Low	Low	Low
Study 187	Low	Low	Low
Study 188	Low	Low	Low
Study 189	Low	Low	Low
Study 190	Low	Low	Low
Study 192	Low	Low	Low
Study 193	Low	Unclear	Unclear
Study 194	Low	Low	Low
Study 195	Low	Unclear	Low
Study 196	Low	Unclear	Low
Study 197	Low	Unclear	Low
Study 198	Low	Low	Low
Study 199	Low	High	Low
Study 200	Low	Low	Low
Study 201	Low	Low	Low
Study 202	Low	Unclear	Low
Study 203	Low	Low	Low
Study 204	Low	Low	Low
Study 205	Low	Unclear	Low
Study 206	Low	Unclear	Low
Study 207	Low	Low	Low
Study 208	Low	Unclear	Low
Study 209	Low	Unclear	Low
Study 210	Low	Unclear	Unclear
Study 211	Low	Unclear	Unclear
Study 212	Low	Low	Unclear
Study 213	Low	Low	Low
Study 214	Low	High	Low
Study 215	Low	Low	Low
Study 216	Low	Low	Low
Study 218	Low	Low	Unclear
Study 219	Low	Unclear	Unclear
Study 220	Low	Unclear	Low
Study 223	Low	Low	Unclear
Study 224	Low	Low	Unclear
Study 225	Low	Low	Low
Study 226	Low	Low	Low
Study 227	Low	Low	Low
Study 228	Low	Low	Unclear
Study 229	Low	Unclear	Low
Study 230	Low	Low	Low
Study 231	Low	Low	Low
Study 232	Low	Low	Low
Study 233	Low	Low	Unclear
Study 234	Low	Low	Unclear
Study 235	Low	Low	Unclear
Study 236	Low	Low	Unclear
Study 237	Low	Low	Low
Study 238	Low	Unclear	Low
Study 239	Low	Low	Unclear
Study 240	Low	Unclear	Unclear
Study 242	Low	Unclear	Unclear
Study 245	Low	Low	Unclear
Study 246	Low	Unclear	Unclear
Study 247	Low	Low	Low
Study 248	Low	Unclear	Unclear
Study 249	Low	Low	Low
Study 250	Low	Low	Unclear
Study 251	Low	Unclear	Unclear
Study 252	Low	Low	Unclear
Study 253	Low	Low	Low
Study 254	Low	High	Low
Study 255	Low	Unclear	Unclear
Study 256	Low	Low	Low
Study 257	Low	Low	Unclear
Study 258	Low	Low	Unclear
Study 259	Low	Low	Low
Study 260	Low	Low	Unclear
Study 261	Low	Low	Unclear
